# Supplementary material for: A highly sensitive, selective ratiometric fluorescent probe for cobalt(ii) and its applications for biological imaging
Source: Royal Society of Chemistry journal article supplement (doi:10.1039/c5dt01248a), 2015-01-01
Supplement: c5dt01248a1.pdf [file c5dt01248a1.pdf]

## Electronic Supplementary Information

### A highly sensitive, selective ratiometric fluorescent probe for cobalt (II) and its applications for biological imaging

Shenyi Zhang, Mei Zhao, Weiping Zhu\*, Yufang Xu \* and Xuhong Qian\*

\*Shanghai Key Laboratory of Chemical Biology, State Key Laboratory of Bioreactor Engineering, and School of Pharmacy, East China University of Science and Technology, Shanghai 200237, China;

E-mail: yfxu@ecust.edu.cn, xhqian@ecust.edu.cn; Fax: +86 21-64252603;

### Contents

|                                                                                                 |     |
|-------------------------------------------------------------------------------------------------|-----|
| 1). Materials and general methods .....                                                         | S 2 |
| 2). Synthesis.....                                                                              | S 2 |
| Scheme 1. Synthesis of Fluorescent probe <b>E3</b> .....                                        | S 2 |
| Preparation of <b>1</b> .....                                                                   | S 2 |
| Preparation of <b>2</b> .....                                                                   | S 2 |
| Preparation of <b>E3</b> .....                                                                  | S 3 |
| 3). Supplementary data .....                                                                    | S 3 |
| Figure S1. The absorbtion spectra of <b>E3</b> .....                                            | S 3 |
| Figure S2. The fluorescence emission spectra of <b>E3</b> .....                                 | S 3 |
| Figure S3. Job plot analysis of <b>E3</b> and Co <sup>2+</sup> .....                            | S 4 |
| Figure S4. Job plot analysis of <b>E3</b> and Co <sup>2+</sup> .....                            | S 4 |
| Figure S5. The fitting curve of fluorescence intensity of <b>E3</b> with Co <sup>2+</sup> ..... | S 4 |
| Figure S6. The ESI-MS assay on detection of Co <sup>2+</sup> with probe <b>E3</b> .....         | S 5 |
| Figure S7. <sup>1</sup> H NMR spectrum of <b>E3</b> .....                                       | S 5 |
| Figure S8. <sup>13</sup> C NMR spectrum of <b>E3</b> .....                                      | S 6 |
| Figure S9. HRMS spectrum of <b>E3</b> .....                                                     | S 6 |

## 1. Materials and general methods:

N, N'-dimethylformamide (DMF) was distilled from calcium hydride (CaH<sub>2</sub>) under anhydrous condition. Other solvents were of analytic grade. All reactions were carried out under a helium atmosphere with analytic grade solvents, unless noted. Mass spectra were measured on a HP 1100 LC-MS spectrometer. Double distilled water was used to prepare all aqueous solutions. All spectroscopic measurements were performed in 50 mM HEPES/EtOH (v/v : 60/40) buffer at pH 7.2. Fluorescence spectra were determined on a VARIAN CARY Eclipse Fluorescence spectrophotometer. Absorption spectra were determined on a VARIAN CARY 100 Bio UV-Visible spectrophotometer. <sup>1</sup>H NMR and <sup>13</sup>C NMR were measured on a BrukerAV-400 spectrometer with chemical shifts reported in ppm (in CDCl<sub>3</sub>; TMS as internal standard). All pH measurements were made with a Sartorius basic pH-Meter PB-10.

All reactions were monitored by thin-layer chromatography (TLC) using UV-light (254 nm) and Flu-light (365 nm). Silica gel (300 - 400 mesh) was used for column chromatography.

## 2. Synthesis:

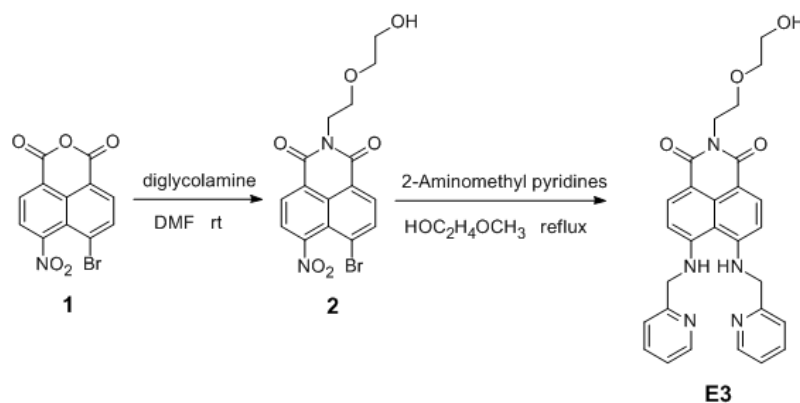

**Scheme 1** Synthesis of fluorescent probe **E3**.

### Preparation of 1:

Compound 1 was prepared according to the reported procedure.<sup>1</sup>

### Preparation of 2:

To a solution of compound 1 (500 mg, 1.55 mmol) in EtOH, diglycolamin (163 mg, 1.55 mmol) was added, and the mixture was stirred refluxing for 2 h. Then the mixture cooled to room temperature, and concentrated in vacuo to afford yellow oil crude compounds. The crude product was purified by column chromatography (silica gel: 100 mL, eluent: DCM/MeOH 50/1) to afford yellow powder 2 in 60 % yield. <sup>1</sup>H NMR (400 MHz, CDCl<sub>3</sub>, 20 °C): δ 8.73 (d, *J* = 8.0 Hz, 1 H), 8.53 (d, *J* = 8.0 Hz, 1 H), 8.23 (d, *J* = 8.0 Hz, 1 H), 7.94 (d, *J* = 8.0 Hz, 1 H), 4.45 (t, *J* = 5.6 Hz, 5.2 Hz, 2 H), 3.87 (t, *J* = 5.2 Hz, 5.6 Hz, 2 H), 3.70 – 3.66 (m, 4 H), 2.1 (s, 1H).

### Preparation of E3:

To a solution of compound 2 (205 mg, 0.50 mmol) in ethylene glycol monomethyl ether, 2-Aminomethyl pyridine (542 mg, 5.01 mmol) was added, and the mixture was stirred at reflux for 6

<sup>1</sup> Y. F. Xu, F. Lu, Z. C. Xu, T. Y. Cheng and X. H. Qian, *Sci. china ser. B-chem.* 2009, **52**, 771.

h. Then the mixture cooled to room temperature, and concentrated in vacuo to afford yellow oil crude compounds. The crude product was purified by column chromatography (silica gel: 100 mL, eluent: DCM/MeOH 20/1) to afford yellow powder **E3** in 42 % yield.  $^1\text{H}$  NMR (400 MHz,  $\text{CDCl}_3$ ,  $20^\circ\text{C}$ ):  $\delta$  8.44 (d,  $J = 8.4$  Hz, 2 H), 8.31 (d,  $J = 4.8$  Hz, 2 H), 7.73 – 7.67 (m, 4 H), 7.41 (d,  $J = 7.6$  Hz, 2 H), 7.21 – 7.18 (m, 2 H), 6.80 (d,  $J = 8.8$  Hz, 2 H), 4.68 (s, 2 H), 4.66 (s, 2 H), 4.42 (t,  $J = 5.6$  Hz, 5.6 Hz, 2 H), 3.86 (t,  $J = 5.6$  Hz, 5.6 Hz, 2H), 3.76 (s, 1 H), 3.72 – 3.68 (m, 4 H).  $^{13}\text{C}$  NMR (100 MHz,  $\text{CDCl}_3$ ,  $20^\circ\text{C}$ ):  $\delta$  170.74, 169.34, 164.96, 156.01, 152.06, 149.04, 136.84, 134.06, 122.52, 121.86, 111.71, 107.08, 72.23, 68.84, 61.91, 49.15, 39.08. HRMS (ESI $^+$ ):  $m/z$  calcd for:  $\text{C}_{28}\text{H}_{28}\text{N}_5\text{O}_4^+$ : 498.2141, found:  $[\text{M}+\text{H}]^+$  498.2147.

### 3. Supplementary data:

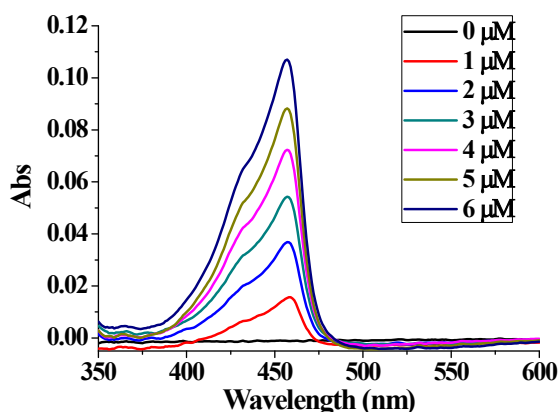

**Figure S1.** The absorption spectra of **E3** with different concentrations in 50 mM HEPES/EtOH (v/v : 60/40) buffer at pH 7.2.

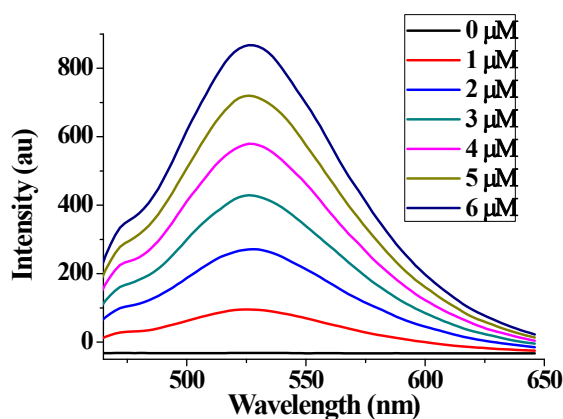

**Figure S2.** The fluorescence emission spectra of **E3** with different concentrations in 50 mM HEPES/EtOH (v/v : 60/40) buffer at pH 7.2.

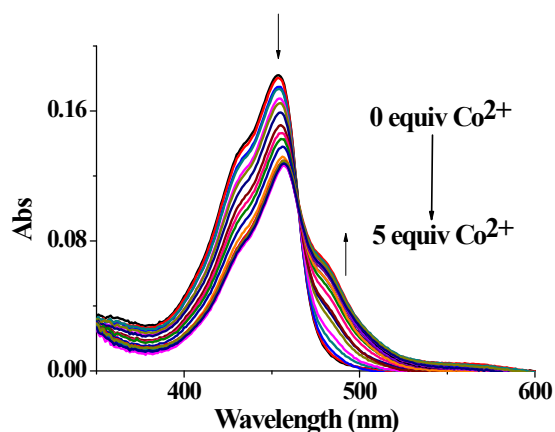

**Figure S3.** The changes in the absorption spectra of **E3** ( $10 \times 10^{-6}$  M in 50 mM HEPES/EtOH (v/v : 60/40) buffer, pH 7.2) upon titration with  $\text{Co}(\text{ClO}_4)_2$  from  $1.0 \times 10^{-6}$  M to  $50 \times 10^{-6}$  M.

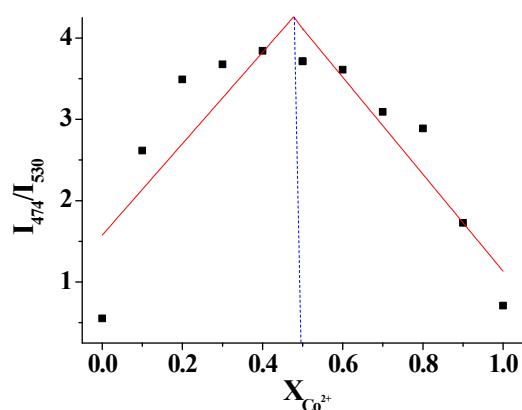

**Figure S4.** Job plot analysis of **E3** and  $\text{Co}^{2+}$  in 50 mM HEPES/EtOH (v/v : 60/40) buffer at pH 7.2; The total molar concentration of **E3** and  $\text{Co}^{2+}$  is  $1.0 \times 10^{-5}$  M.

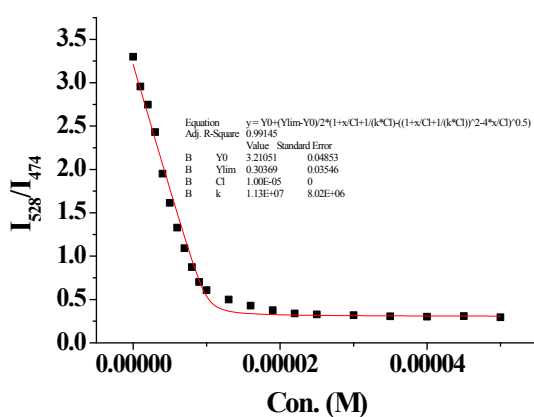

**Figure S5.** The fitting curve of fluorescence intensity at  $I_{474}$  nm/ $I_{528}$  nm of **E3** versus increasing concentrations of  $\text{Co}^{2+}$  in water/EtOH solution (v/v : 60/40, 50 mM HEPES buffer, pH 7.2). The concentration of **E3** was  $10 \times 10^{-6}$  M.

## Multiple Mass Analysis: 2 mass(es) processed

Tolerance = 5.0 PPM / DBE: min = -1.5, max = 100.0

Isotope cluster parameters: Separation = 1.0 Abundance = 1.0%

Monoisotopic Mass, Odd and Even Electron Ions

20 formula(e) evaluated with 2 results within limits (up to 50 closest results for each mass)

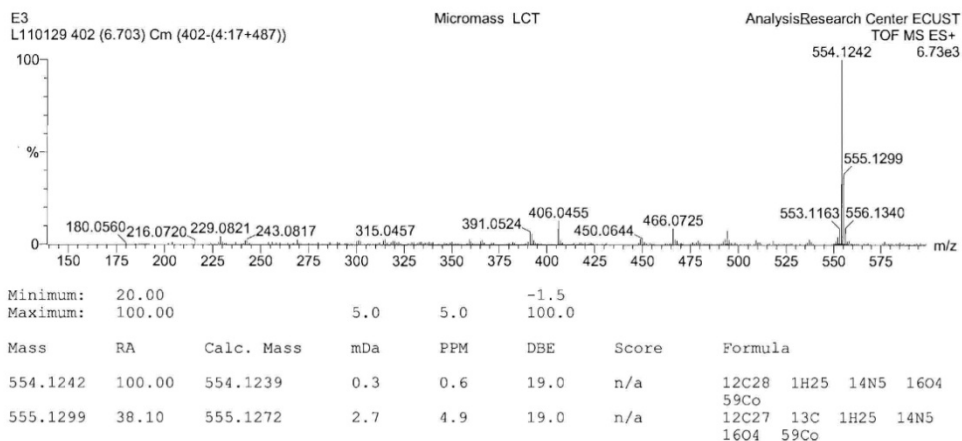Figure S6. The ESI-MS assay on detection of  $\text{Co}^{2+}$  with probe E3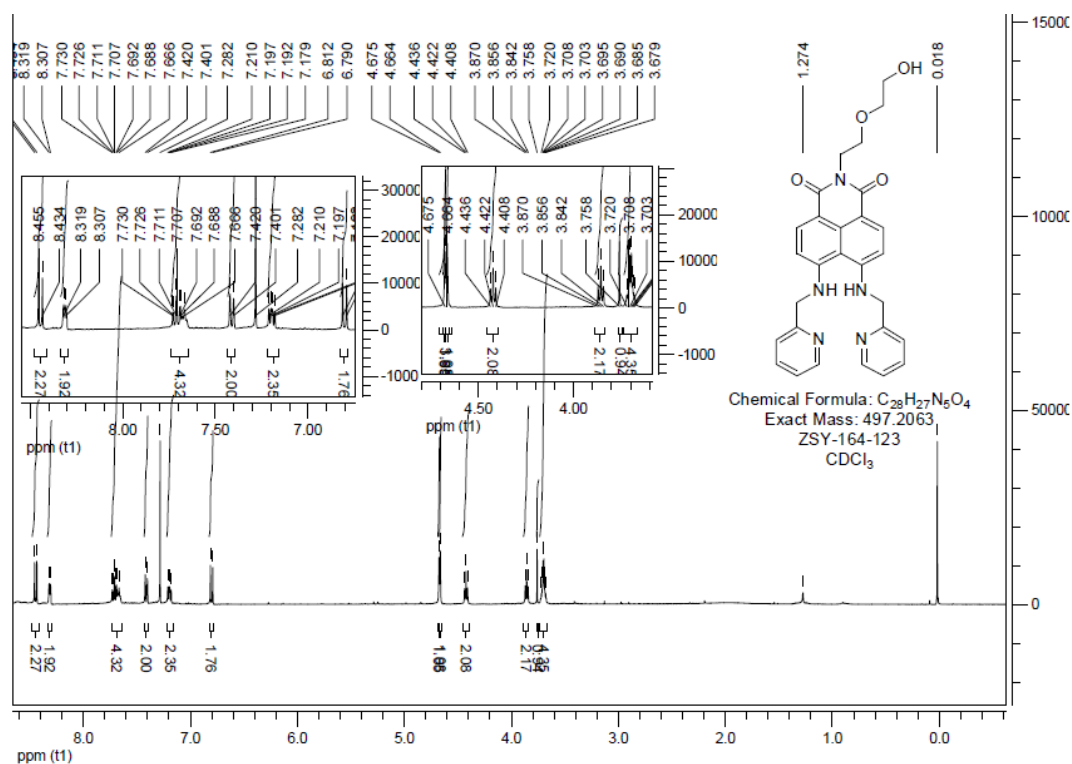Figure S7.  $^1\text{H}$  NMR spectrum of E3

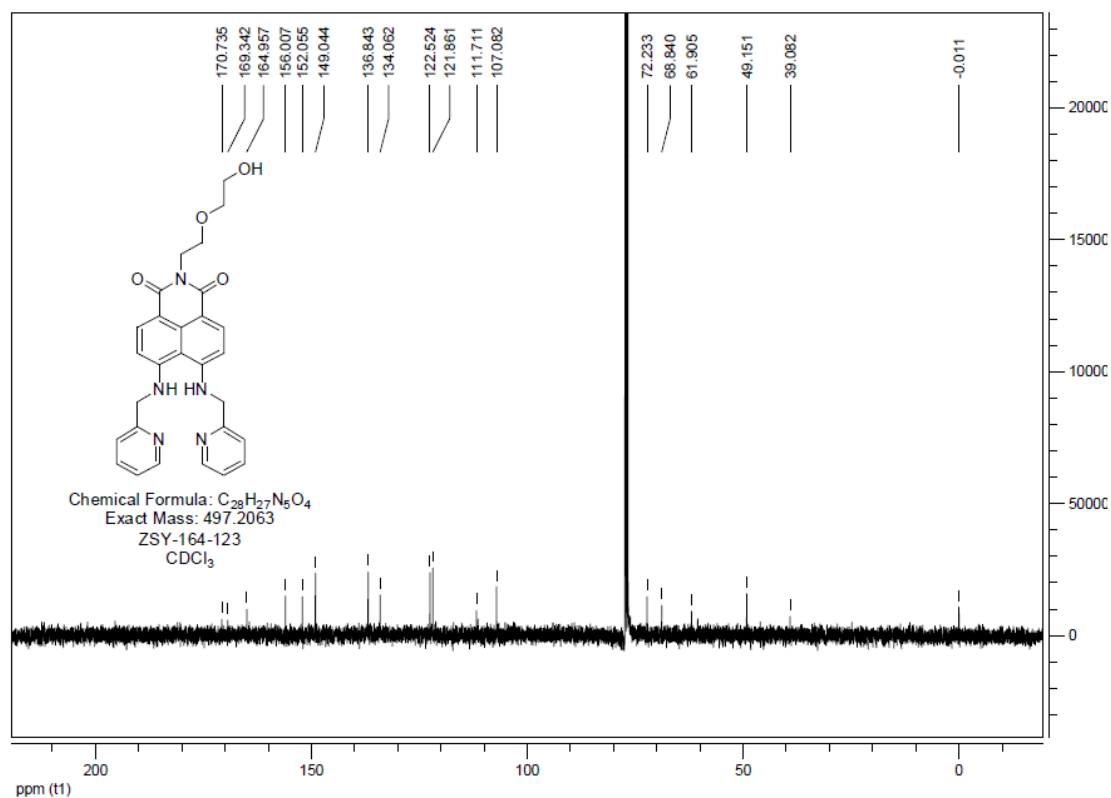

Figure S8.  $^{13}\text{C}$  NMR spectrum of E3

Elemental Composition Report

Page 1

Single Mass Analysis

Tolerance = 3.0 mDa / DBE: min = -1.5, max = 100.0

Element prediction: Off

Number of isotope peaks used for i-FIT = 2

Monoisotopic Mass, Even Electron Ions

30 formula(e) evaluated with 1 results within limits (up to 1 best isotopic matches for each mass)

Elements Used:

C: 0-30 H: 0-30 N: 0-5 O: 0-5

YYS

ECUST institute of Fine Chem

14-May-2011

17:47:20

1: TOF MS ES+

6.47e+003

YYS-ZSY-164-121-R 6 (0.275) Cm (2:6)

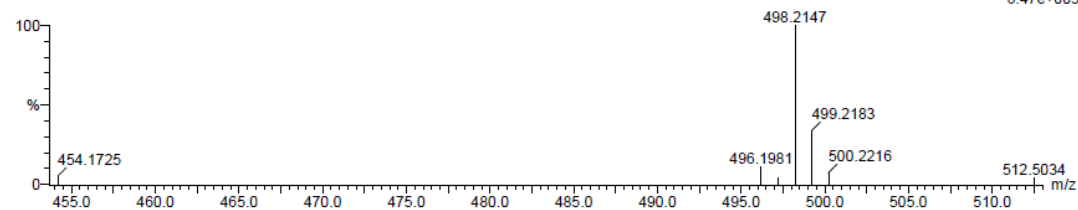

Minimum:

Maximum: 3.0 50.0 -1.5 100.0

| Mass     | Calc. Mass | mDa | PPM | DBE  | i-FIT | i-FIT (Norm) | Formula       |
|----------|------------|-----|-----|------|-------|--------------|---------------|
| 498.2147 | 498.2141   | 0.6 | 1.2 | 17.5 | 7.6   | 0.0          | C28 H28 N5 O4 |

Figure S9. HRMS spectrum of E3
